# Supplementary material
Source: publisher figshare collection journal article supplement (https://acs.figshare.com/ndownloader/files/15667127)
Supplement: Supplementary file 1 [file 15667127]

## Supporting Information

### O<sub>2</sub> Reduction to Water by High Potential Multicopper Oxidases: Contributions of the T1 Copper Site Potential and the Local Environment of the Trinuclear Copper Cluster

Alina Sekretaryova, Stephen M. Jones, Edward I. Solomon\*

Department of Chemistry, Stanford University, 333 Campus Drive, Stanford, California 94305-5080, United States

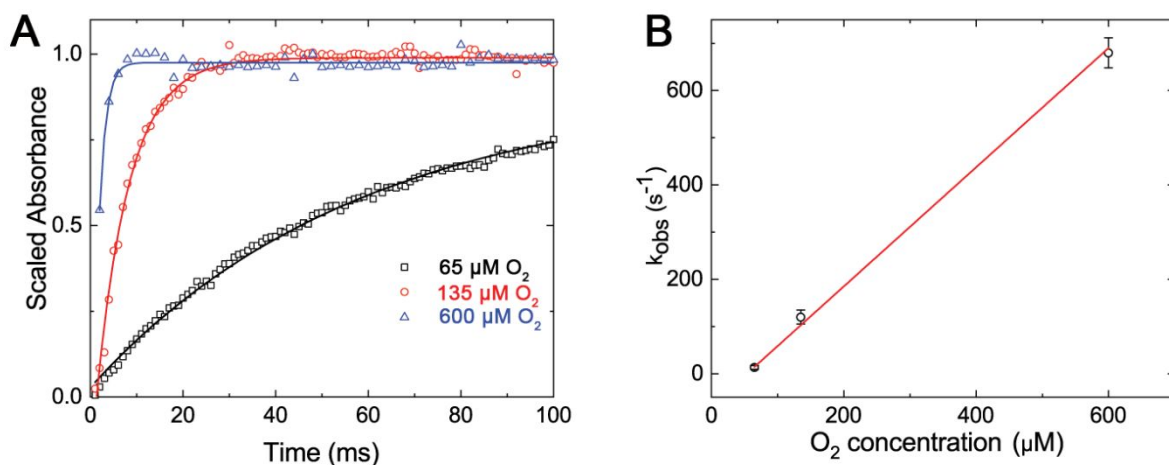

**Figure S1.** Reaction of the reduced *TvL* with O<sub>2</sub> at various concentrations monitored by a rapid scan stopped-flow instrument at pH 6.0 and 4 °C; [Lc] = 50 μM. (A) Absorption traces of the T1 (610 nm) charge transfer band, various O<sub>2</sub> concentrations are shown by different colors: [O<sub>2</sub>] = 65 μM in black, 135 μM in red, 600 μM in blue; open dots are experimental data, solid lines are kinetic fits to the pseudo-first order rate equation. (B) The dependence of the calculated pseudo-first rate constant on O<sub>2</sub> concentrations, yielding the second-order rate constant of  $(1.2 \pm 0.3) \times 10^6 \text{ M}^{-1} \text{ s}^{-1}$ .

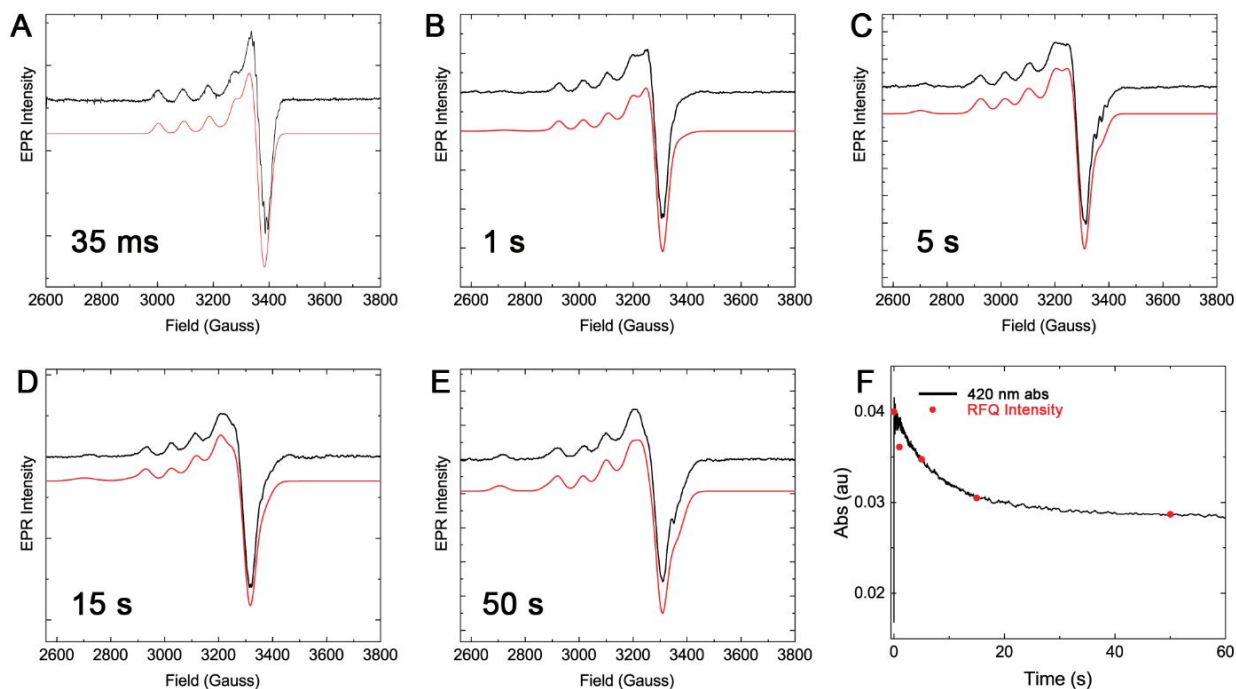

**Figure S2.** The native intermediate decay kinetics at pH 6.0 monitored by the RFQ-EPR and stopped-flow absorbance. (A)-(E) RFQ-EPR spectra (black) and fits (red) of the native intermediate at 35 ms, 1 s, 5 s, 15 s and 50 s, respectively. (F) Kinetic profiles of UV-vis absorbance at 420 nm (black line) with overlaid relative EPR intensities of the intermediate (red dots).

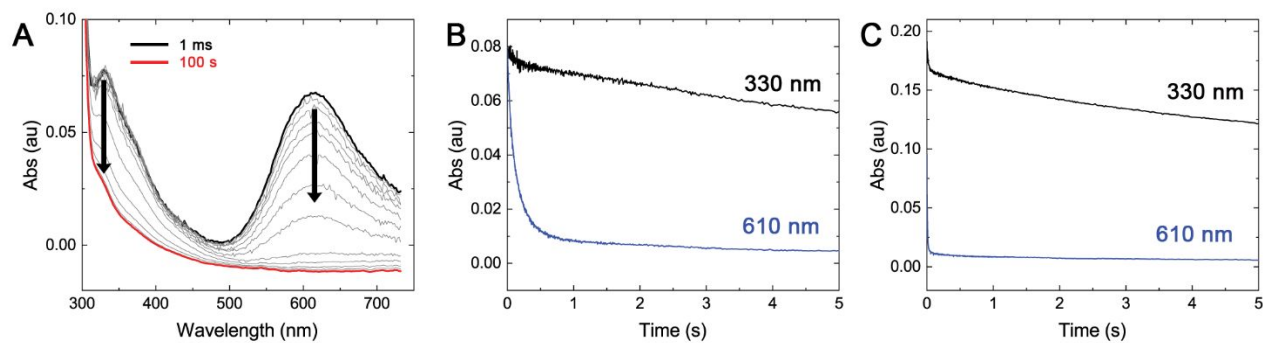

**Figure S3.** Resting oxidized enzyme reduction by ascorbic acid monitored by a rapid scan stopped-flow instrument at pH 6.0 and 4 °C;  $[Lc] = [O_2] = 0.05$  mM (A) Absorption spectra from 1 ms to 100 s;  $[Ascorbic\ acid] = 0.25$  mM. (B) and (C) Absorption traces of the T1 (610 nm, blue) and TNC (330 nm, black) charge transfer bands in the reduction of RO with 0.25 mM and 5 mM ascorbic acid, respectively.

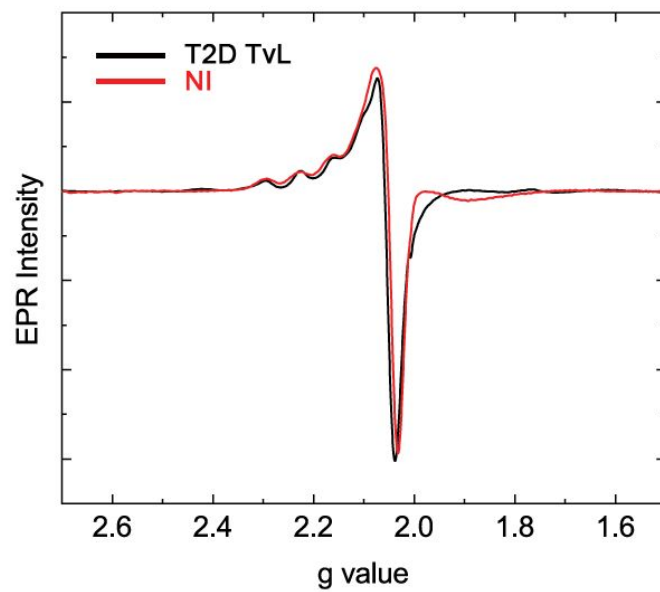

**Figure S4.** Overlaid EPR spectra of the native intermediate and T2D *TvL* at 20 mW and 5K.

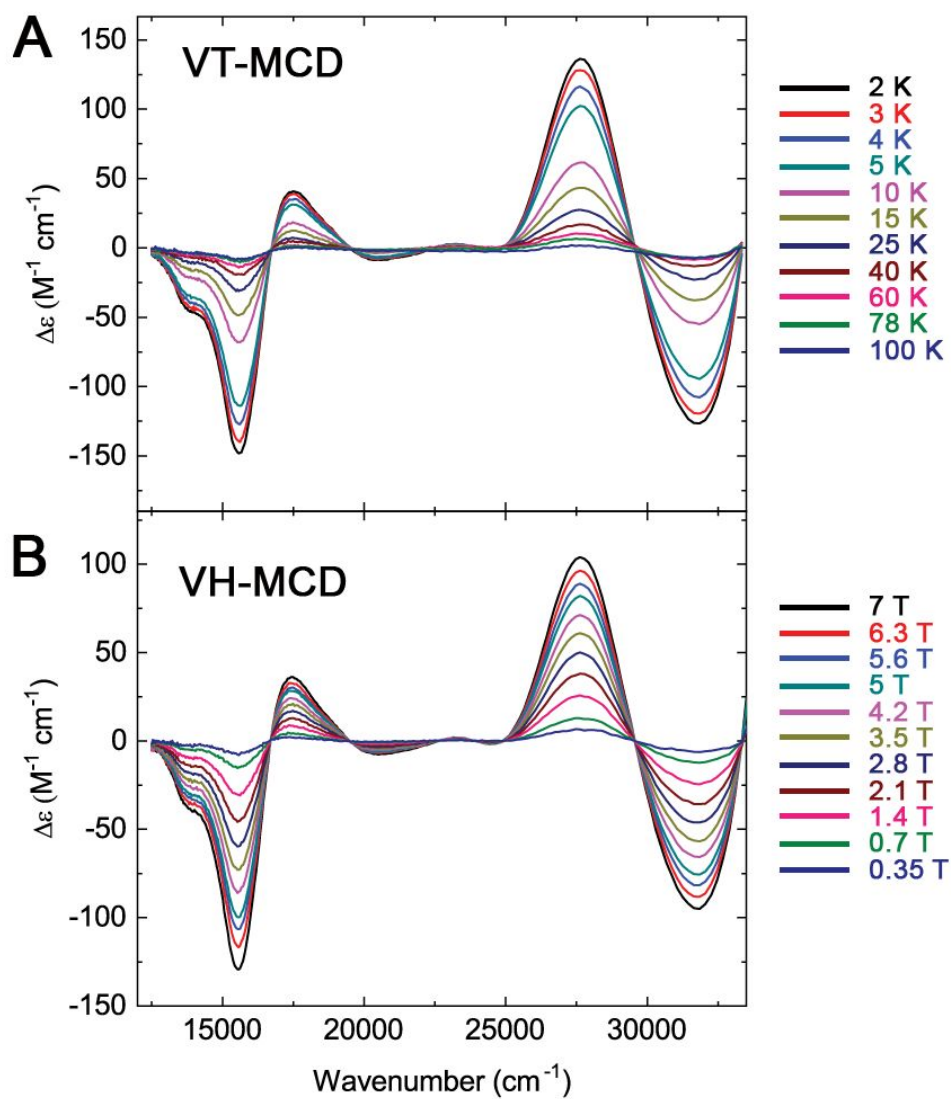

**Figure S5.** VT and VH-MCD spectra of the native intermediate (A) The native intermediate MCD spectra at 2, 3, 4, 5, 10, 15, 25, 40, 60, 80 and 100 K with a constant field set at 7T. (B) The native intermediate MCD spectra at 0.35, 0.7, 1.4, 2.1, 2.8, 3.5, 4.2, 5.0, 5.6, 6.3, 7T at 5K.

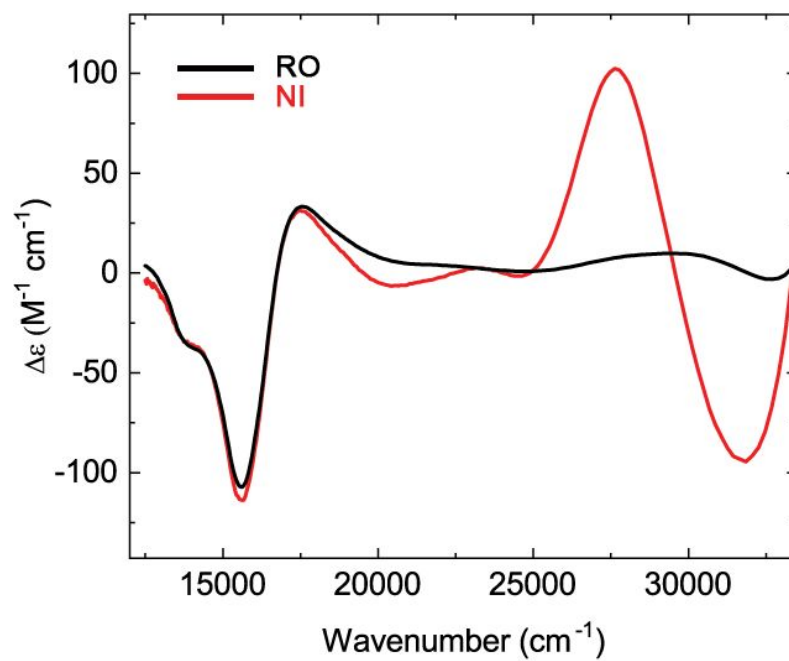

**Figure S6.** The native intermediate (red) and resting oxidized (black) MCD spectra at 7T and 5K.

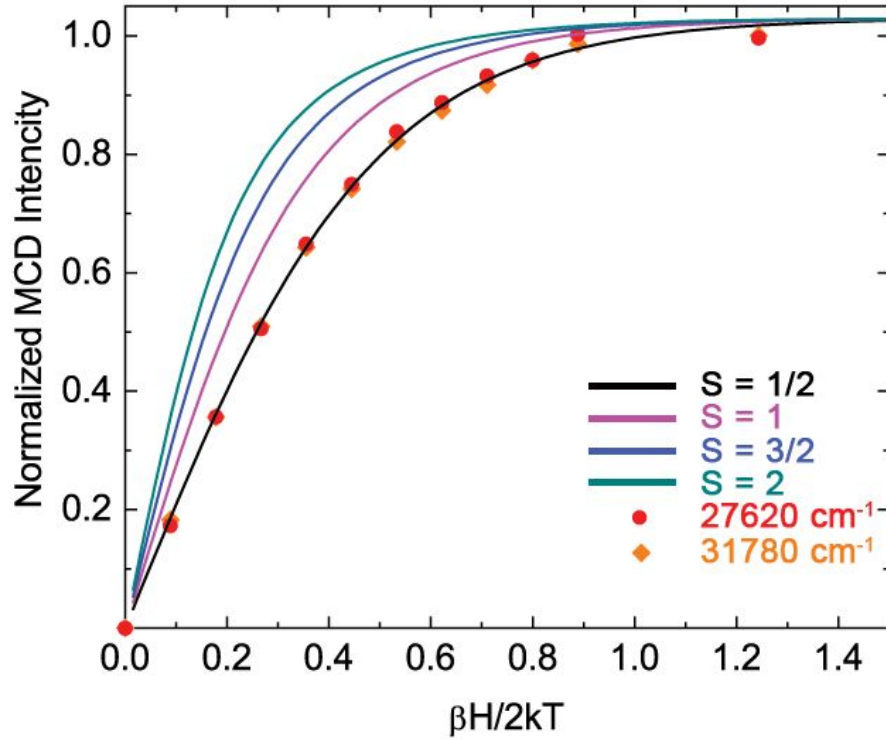

**Figure S7.** Saturation magnetization of the NI MCD spectrum at 27620 and 31780  $\text{cm}^{-1}$ . Temperature is set at 1.89K and the applied field varied from 0 to 7 T. Solid lines are normalized Brillouin curves using g value of 2.06 and the spin states as shown. The curves were generated using the Brillouin function,  $B_s(x)$ , for a ground state with various given spin states according to equations:

$$M = NgS\beta B_s(x) \quad (\text{S1})$$

$$B_s(x) = \left[ \frac{2S+1}{2S} \coth\left(\frac{2S+1}{2S}x\right) - \frac{1}{2S} \coth\left(\frac{1}{2S}x\right) \right] \quad (\text{S2})$$

where  $x$  is  $gS\beta H/kBT$ ,  $N$  is Avogadro's number,  $S$  is a given spin state,  $\beta$  is the Bohr magneton ( $9.274 \times 10^{-24} \text{ J T}^{-1}$ ),  $H$  is the applied field in tesla.



**Table S1.** Experimental spectroscopic parameters for the Native Intermediate in *TvL*

| Band | Assignment                                           | Energy, cm <sup>-1</sup> | $\Delta\epsilon$ , M <sup>-1</sup> cm <sup>-1</sup> | $\epsilon$ , M <sup>-1</sup> cm <sup>-1</sup> | C/D     |
|------|------------------------------------------------------|--------------------------|-----------------------------------------------------|-----------------------------------------------|---------|
| 1    | $\mu_3\text{-oxo} \rightarrow \text{Cu}^{\text{II}}$ | 24700                    | -8.7                                                | 1052                                          | -0.0078 |
| 2    | $\mu_3\text{-oxo} \rightarrow \text{Cu}^{\text{II}}$ | 27350                    | 126                                                 | 1360                                          | 0.087   |
| 3    | $\mu_3\text{-oxo} \rightarrow \text{Cu}^{\text{II}}$ | 28400                    | 38                                                  | 2300                                          | 0.015   |
| 4    | $\mu_3\text{-oxo} \rightarrow \text{Cu}^{\text{II}}$ | 31000                    | -178                                                | 2110                                          | -0.079  |
| 5    | $\mu_3\text{-oxo} \rightarrow \text{Cu}^{\text{II}}$ | 32250                    | -89                                                 | 1105                                          | -0.075  |
